# Supplementary material for: In situ self-exsolved ultrasmall Fe2P quantum dots from attapulgite nanofibers as superior cocatalysts for solar hydrogen evolution
Source: Royal Society of Chemistry journal article supplement (doi:10.1039/d2nr06607f), 2023-01-01
Supplement: d2nr06607f1.pdf [file d2nr06607f1.pdf]

## Electronic Supplementary Information

### ***In situ* self-exsolved ultrasmall Fe<sub>2</sub>P quantum dots from attapulgite nanofibers as a superior cocatalyst for solar hydrogen evolution**

Fang Wang,<sup>a,b</sup> Haihong Ma,<sup>a</sup> Fengmei Ren,<sup>a</sup> Zhengfa Zhou,<sup>a</sup> Zhengguo Zhang,<sup>b</sup>

Weibing Xu<sup>\*a</sup> and Shixiong Min<sup>b\*</sup>

<sup>a</sup> *School of Chemistry and Chemical Engineering, Hefei University of Technology,  
Hefei, 230009, P. R. China.*

<sup>b</sup> *School of Chemistry and Chemical Engineering, North Minzu University, Yinchuan,  
750021, P. R. China.*

\*Corresponding authors: [weibingxu@hfut.edu.cn](mailto:weibingxu@hfut.edu.cn); [sxmin@nun.edu.cn](mailto:sxmin@nun.edu.cn)

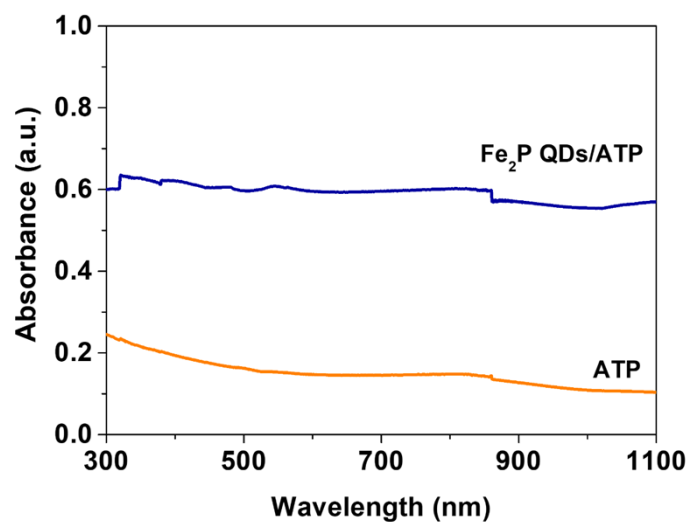

**Fig. S1** UV-vis diffuse reflectance spectra of ATP and Fe<sub>2</sub>P QDs/ATP.

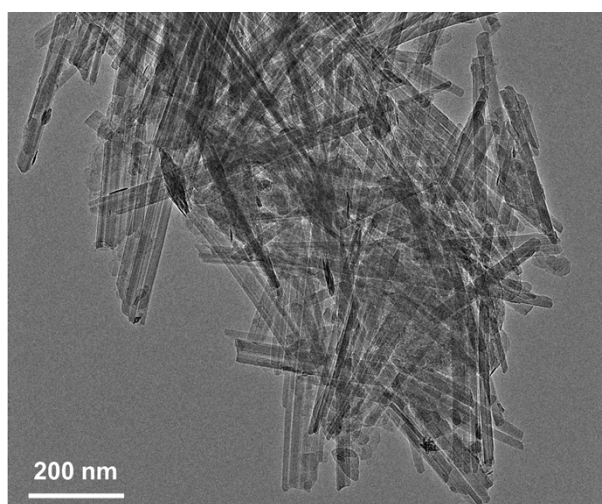

**Fig. S2** TEM image of the purified ATP.

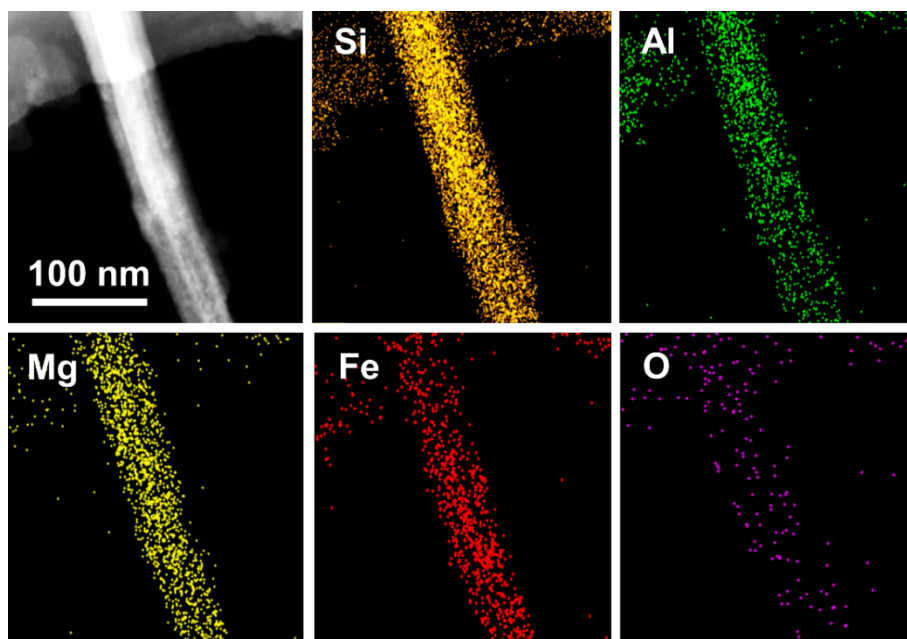

Fig. S3 EDS elemental mapping images of purified ATP.

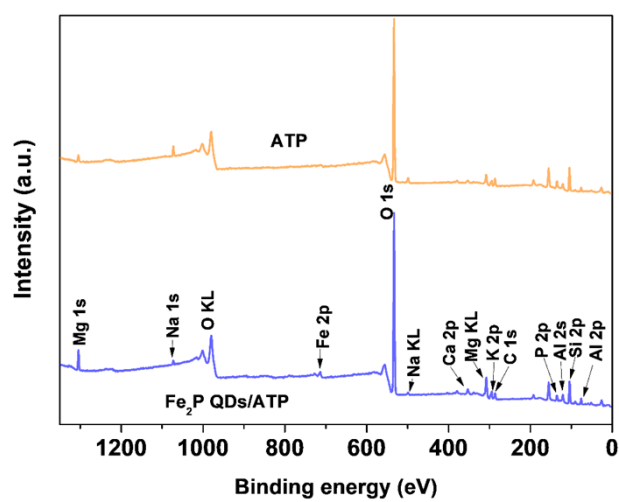

Fig. S4 XPS survey spectra of ATP and Fe<sub>2</sub>P QDs/ATP.

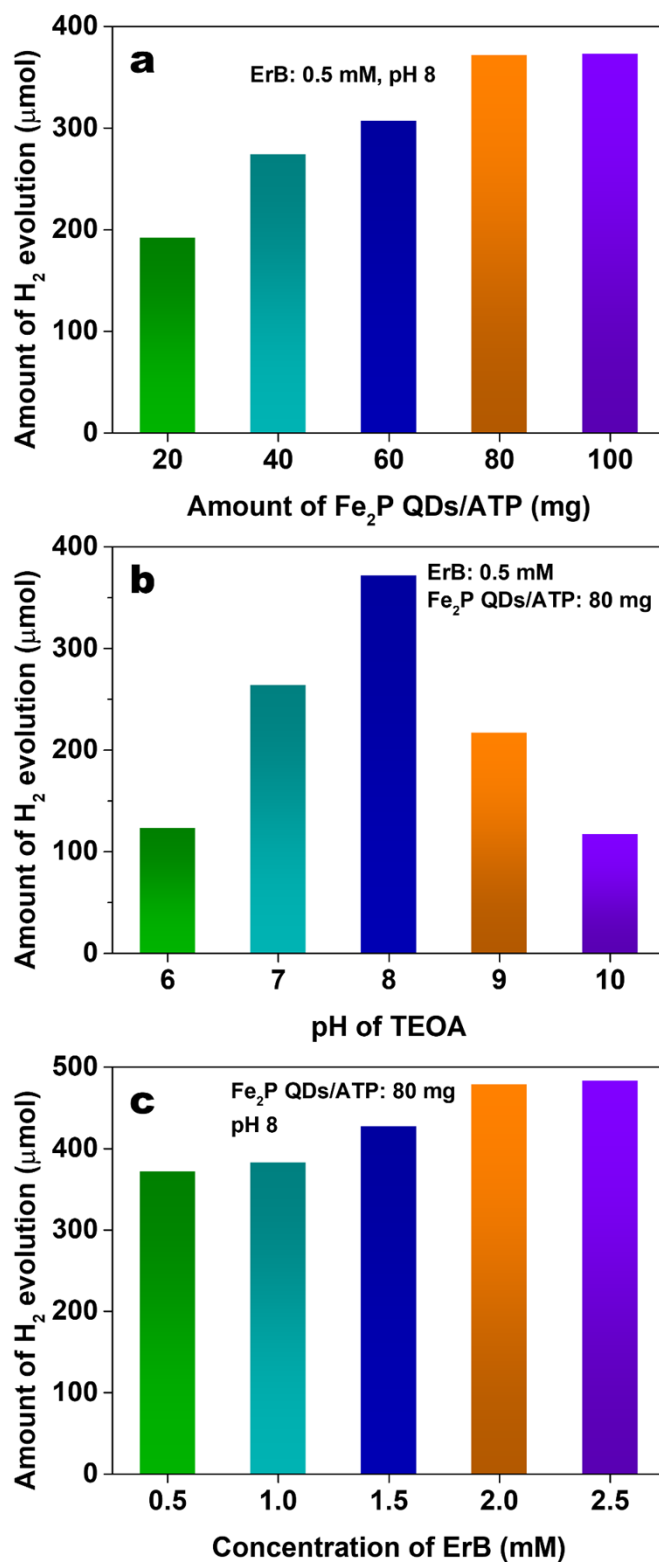

**Fig. S5** Photocatalytic H<sub>2</sub> evolution catalyzed by Fe<sub>2</sub>P QDs/ATP from ErB-TEOA system as a function of (a) Fe<sub>2</sub>P QDs/ATP concentration, (b) pH value of TEOA solution, and (c) ErB concentration. Reaction conditions: light source, white LED lamp, 380 nm  $\leq \lambda \leq$  780 nm; TEOA solution, 25 mL, 10 vol%; reaction time, 5 h.

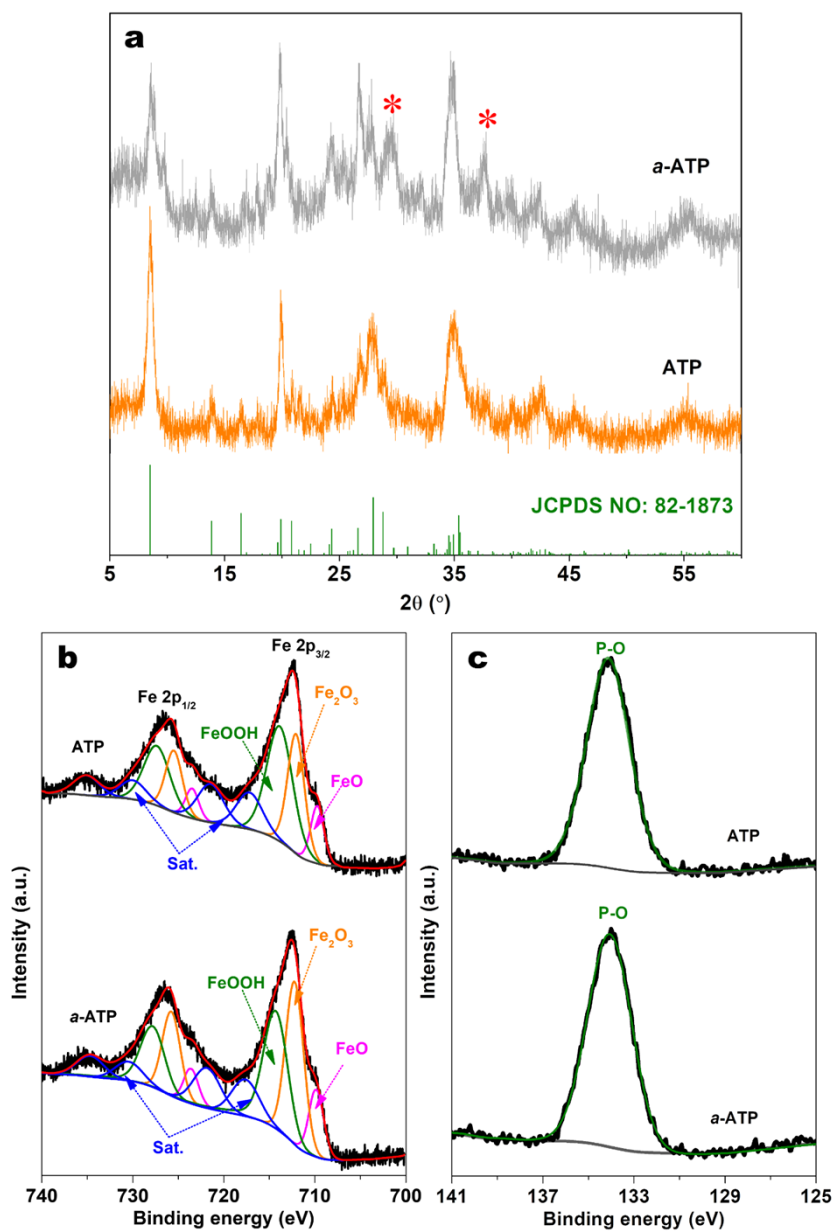

**Fig. S6** (a) XRD patterns, (b) Fe 2p, and (c) P 2p XPS spectra of ATP and *a*-ATP.

The symbol “\*” represents the XRD peaks from Fe-containing Si, Al, and Mg oxides.

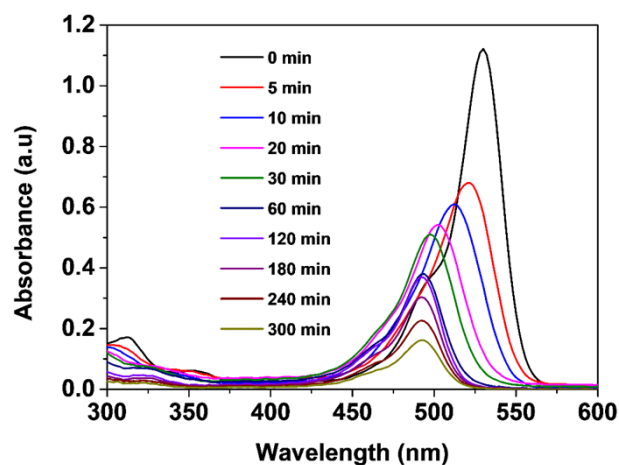

**Fig. S7** Time-depedent UV-vis absorption spectra of the system containing ErB (2.0 mM) and Fe<sub>2</sub>P QDs/ATP (80 mg) in a TEOA solution upon irradiation. The Fe<sub>2</sub>P QDs/ATP particles were removed by centrifugation prior to measurement and the solution was diluted by 10 times. Reaction conditions: Light source: white LED lamp,  $380 \text{ nm} \leq \lambda \leq 780 \text{ nm}$ ; TEOA solution: 25 mL, 10 vol%, pH 8.

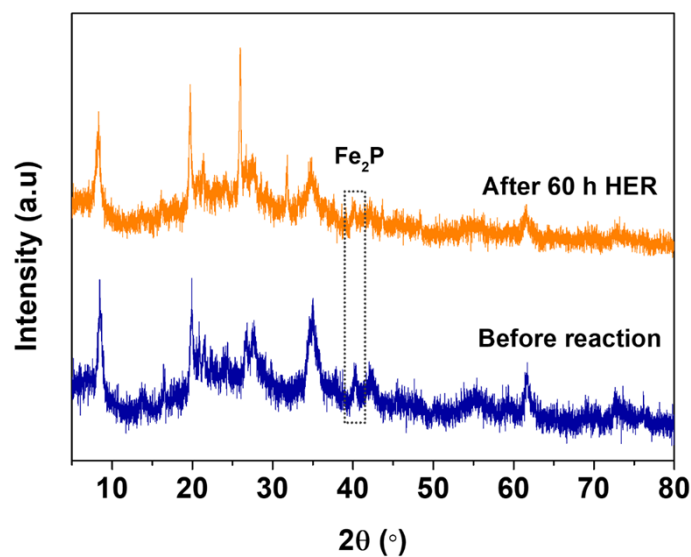

**Fig. S8** XRD patterns of Fe<sub>2</sub>P QDs/ATP before and after a 60-h HER stability test.

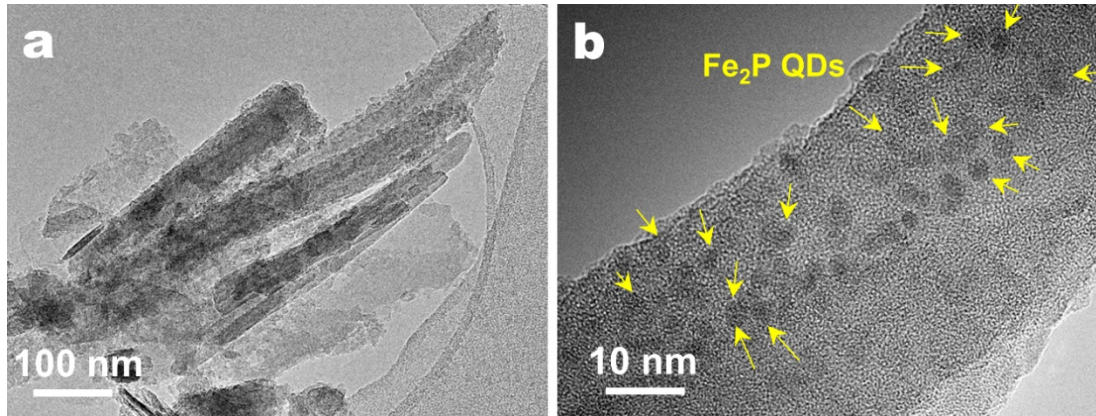

**Fig. S9** TEM and HRTEM images of Fe<sub>2</sub>P QDs/ATP after a 60-h HER stability test.

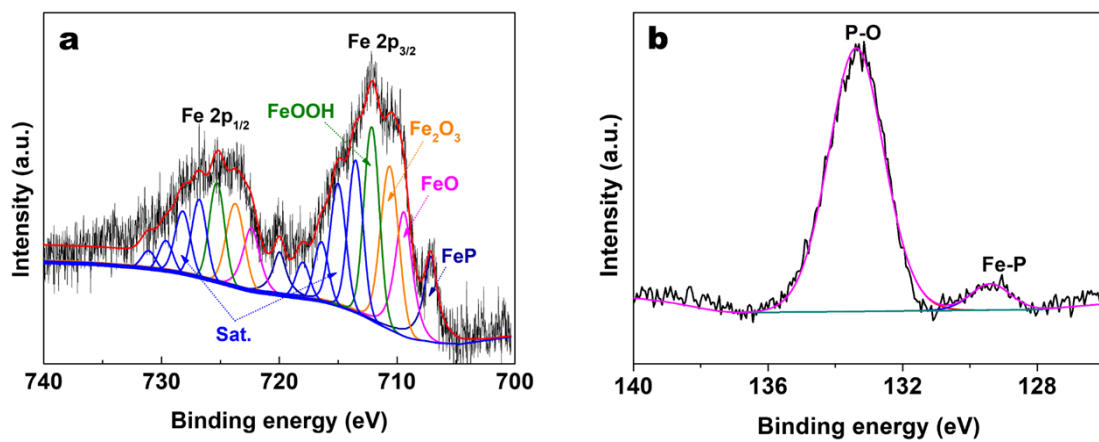

**Fig. S10** (a) Fe 2p and (b) P 2p XPS spectra of Fe<sub>2</sub>P QDs/ATP after a 60-h HER stability test.

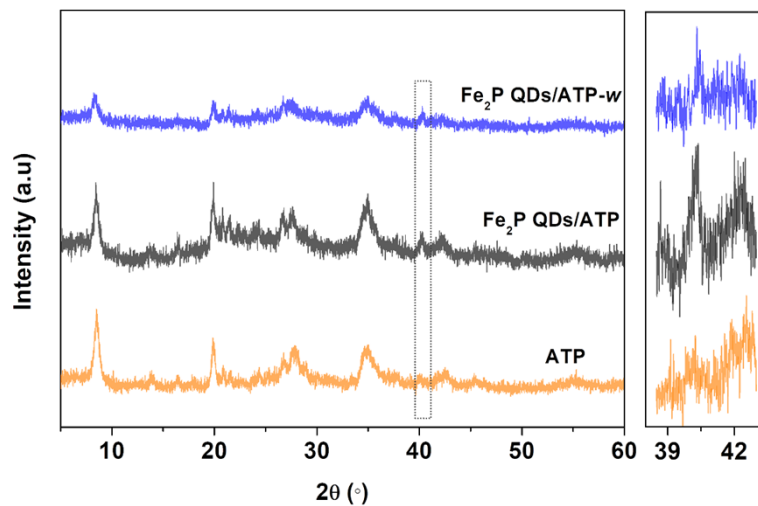

**Fig. S11** Comparison of XRD patterns of ATP, Fe<sub>2</sub>P QDs/ATP, and Fe<sub>2</sub>P QDs/ATP-

w.

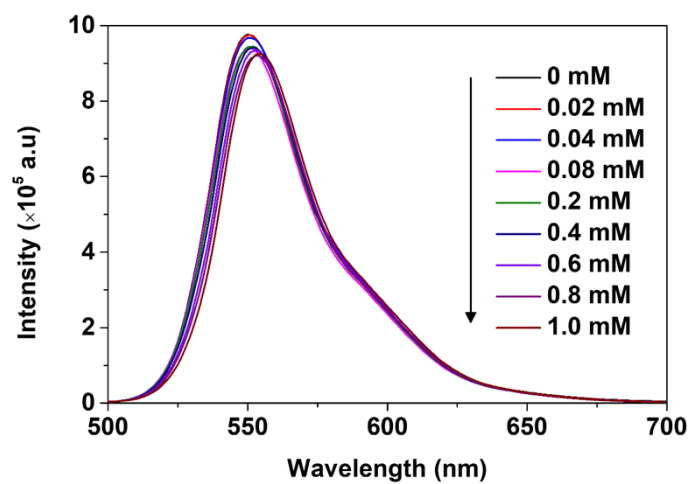

**Fig. S12** PL emission quenching of ErB aqueous solutions (10  $\mu\text{M}$ , pH 8.0) by TEOA.

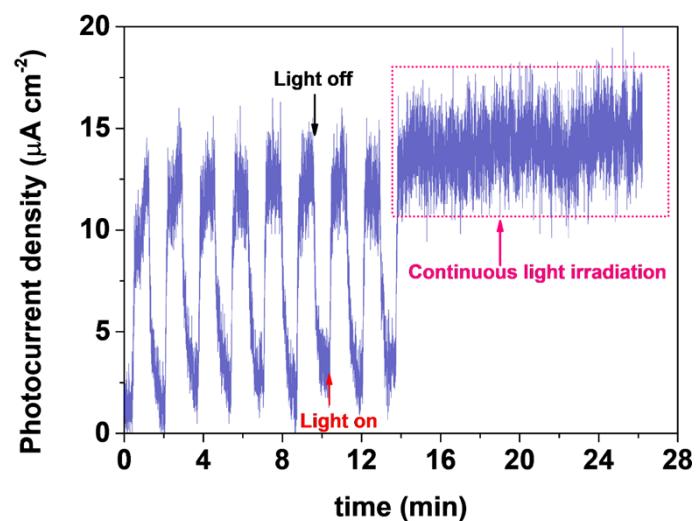

**Fig. S13** Photocurrent responses of ErB-sensitized  $\text{Fe}_2\text{P}$  QDs/ATP photocatalytic suspension system under visible light irradiation.



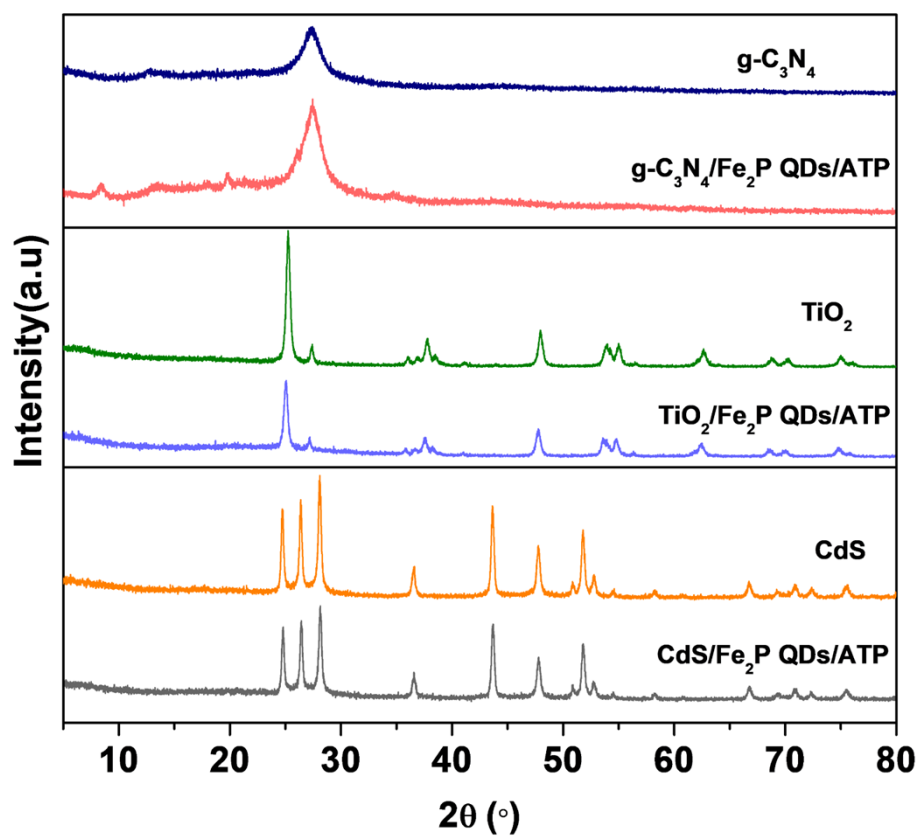

**Fig. S14** XRD patterns of g-C<sub>3</sub>N<sub>4</sub>, TiO<sub>2</sub>, and CdS and their composites with 10 wt% Fe<sub>2</sub>P QDs/ATP.

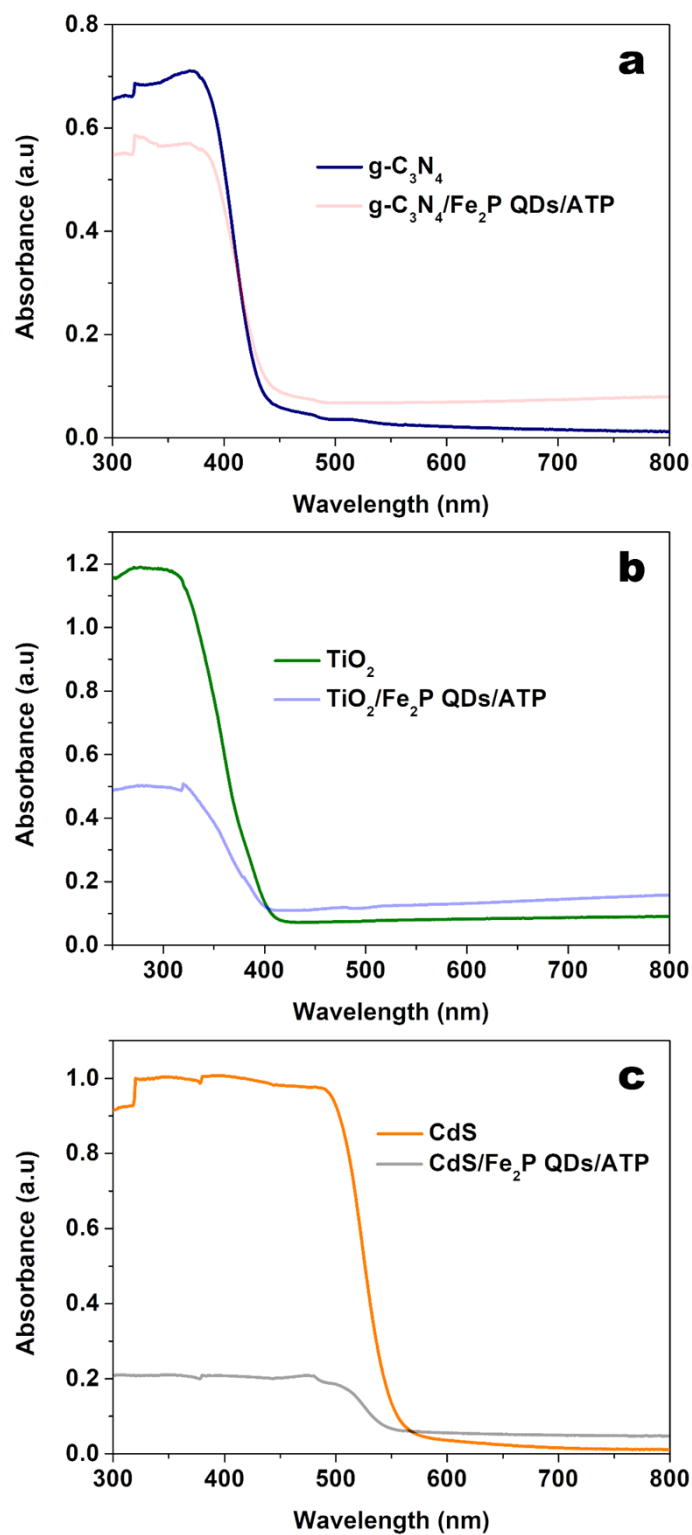

**Fig. S15** UV-vis diffuse reflectance spectra of (a) g-C<sub>3</sub>N<sub>4</sub>, (b) TiO<sub>2</sub>, and (d) CdS and their composites with 10 wt% Fe<sub>2</sub>P QDs/ATP.
